# Supplementary material
Source: PubMed Central journal article supplement (PMC8193413)
Supplement: 12250_2016_3791_MOESM1_ESM.pdf [file 12250_2016_3791_MOESM1_ESM.pdf]

## Electronic Supplementary Material

### ***De novo* transcriptome analysis of *Spodoptera exigua* multiple nucleopolyhedrovirus (SeMNPV) genes in latently infected Se301 cells**

Zheng Fang, Jingxu Shao, Qingbei Weng✉

School of Life Sciences, Guizhou Normal University, Guiyang 550001, China

Supporting information to DOI: 10.1007/s12250-016-3791-8

Table S1. Names and sequences of the primers used for the RT-PCR and 5'/3' RACE-PCR

| Primer  | Sequence (5'-3')     | Genome site (nt) | Product size (bp) |
|---------|----------------------|------------------|-------------------|
| RT-PCR  |                      |                  |                   |
| se5-F   | GCCTCTGCTATCGTTGCT   | 6832–6849        | 858               |
| se5-R   | CTGATCGGTGGTTTCTCC   | 7689–7672        |                   |
| se7-F   | GAGGAGATACGAGGTGATG  | 9674–9692        | 753               |
| se7-R   | TTCCAAACTTTAGTGCC    | 10426–10409      |                   |
| se8-F   | CGCCAAAGACATAGTCCA   | 12557–12574      | 1736              |
| se8-R   | GCGTCAACATTGCCATTA   | 14292–14275      |                   |
| se12-F  | TATAGCGTTCTGTTTAGCG  | 16124–16142      | 557               |
| se12-R  | ATTGGATTGGTGCCTTTG   | 16680–16663      |                   |
| se43-F  | TCAGCGTCAATAGACTCAT  | 43066–43084      | 651               |
| se43-R  | CGAAGCGATTCAAAAGTA   | 43716–43698      |                   |
| se45-F  | ACGACGACTTTACCCAGAA  | 44523–44541      | 656               |
| se45-R  | ATCGGCGACAAACTCAAT   | 45178–45161      |                   |
| se89-F  | ACCAACGCCGATTGTCTG   | 86155–86138      | 566               |
| se89-R  | GTGCGGTGGGCATCTTCA   | 85590–85607      |                   |
| se90-F  | AGGGACCGTGTCAAGTA    | 86765–86748      | 301               |
| se90-R  | CTGCCACCGTCAATAGGA   | 86465–86482      |                   |
| se124-F | GGTTGGGTGACGTGATAC   | 118937–118954    | 413               |
| se124-R | GTCGCTACATTCGTAGTTGT | 119349–119330    |                   |
| se126-F | TGGGATACTCAAGCCTAAA  | 121203–121221    | 533               |
| se126-R | TCTCGCTCACCTTCTTATT  | 121737–121756    |                   |

To be continued

| Primer       | Sequence (5'-3')      | Genome site (nt) | Product size (bp) |
|--------------|-----------------------|------------------|-------------------|
| RACE-PCR     |                       | –                | –                 |
| GSP-se5-F    | CAAGAGGAGCCCTGGAAC    | –                | –                 |
| GSP-se5-R    | GTGGAGGTAGAATACGGC    | –                | –                 |
| GSP-se7-F    | GAGGAGATACGAGGTGATG   | –                | –                 |
| GSP-se7-R    | CCGTGATTTCAAACCTTT    | –                | –                 |
| GSP-se8-F    | CGCCAAAGACATAGTCCA    | –                | –                 |
| GSP-se8-R    | ATTACCGTTACAACCTGCG   | –                | –                 |
| GSP-se12-F   | AGCGACATACCGTTGCAAGT  | –                | –                 |
| GSP-se12-R   | GGCGATGTACGCGTTGAAAA  | –                | –                 |
| GSP-se43-F   | CACCTTCGCCCTCAACAGAT  | –                | –                 |
| GSP-se43-R   | AGCGCGTACAGAATGCTCTT  | –                | –                 |
| GSP-se45-F   | TGTCTGCCGCACGAAAAGTA  | –                | –                 |
| GSP-se45-R   | CTAAACGTCAGTCCGGGCAT  | –                | –                 |
| GSP-se89-F   | CCGGCCAGTTTGCCAAATAC  | –                | –                 |
| GSP-se89-R   | TCGTTTCCGCTAACGTGCGAA | –                | –                 |
| GSP-se124-F  | CCAAAATCCCAGACGACAACG | –                | –                 |
| GSP-se124-R  | GGTCGCGCATCATCATCAAC  | –                | –                 |
| GSP-se126-F  | CGTTTCTGCGGAATCTCTG   | –                | –                 |
| GSP-se126-R  | TTGATCGCGAGCGAATACGA  | –                | –                 |
| NGSP-se5-F   | TGATTCGATGGCCTACCCG   | –                | –                 |
| NGSP-se5-R   | TTTCCGGTCTGTCATCAGGC  | –                | –                 |
| NGSP-se7-F   | AGCGCAGAACCCTATGTCAA  | –                | –                 |
| NGSP-se7-R   | TCTCGTCTCGGTGACCGTAT  | –                | –                 |
| NGSP-se8-F   | GTGCCGCATGAGCGATAAAG  | –                | –                 |
| NGSP-se8-R   | TCGCTTTCGAACCTACCCAC  | –                | –                 |
| NGSP-se12-F  | GAAGCGTTGACGCCGAAAAA  | –                | –                 |
| NGSP-se12-R  | GCGCGGACGAACTTGAAAAT  | –                | –                 |
| NGSP-se43-F  | GATTGCAGCCGTTCAAGAGC  | –                | –                 |
| NGSP-se43-R  | CCCAAGGTGTACGTGTCGAT  | –                | –                 |
| NGSP-se45-F  | CAGGCGTTGGATTGCATGTG  | –                | –                 |
| NGSP-se45-R  | TTGACTATACTGTCGGCGGC  | –                | –                 |
| NGSP-se89-F  | GGCGTCACCTTACGAGACAA  | –                | –                 |
| NGSP-se89-R  | TGTCAAGCAGCCGTACATT   | –                | –                 |
| NGSP-se124-F | CCGCCGTTAAACAACCATCG  | –                | –                 |
| NGSP-se124-R | TCTCCAAGACGACTCCCA    | –                | –                 |
| NGSP-se126-F | GAGCATTGTTGGTCAAGC    | –                | –                 |
| NGSP-se126-R | AGAACTTGCGCACAAACGTC  | –                | –                 |

Table S2. Statistical results of the stringent filtering processes

| Cell line   | Raw reads  | Quality trimmed | Adaptor trimmed | rRNA trimmed | Clean ratio |
|-------------|------------|-----------------|-----------------|--------------|-------------|
| P8-Se301-C1 | 54,569,296 | 54,292,372      | 53,666,292      | 52,784,058   | 96.7%       |
| Se301       | 56,865,504 | 56,639,360      | 55,941,000      | 55,033,958   | 96.8%       |

Table S3. Statistical results concerning the primary unigenes from P8-Se301-C1 and Se301 cells

| Cell line   | Counts  | Total length (nt) | N50 (nt) | Mean length | N%  | GC%  |
|-------------|---------|-------------------|----------|-------------|-----|------|
| P8-Se301-C1 | 116,048 | 136,121,302       | 2,137    | 1,173       | 0.0 | 37.5 |
| Se301       | 104,600 | 122,303,958       | 2,145    | 1,169       | 0.0 | 37.6 |

Table S4. Statistical results concerning the final unigenes from P8-Se301-C1 and Se301 cells

| Cell line   | Counts  | Total length (nt) | N50 (nt) | Mean length | N%  | GC%  |
|-------------|---------|-------------------|----------|-------------|-----|------|
| P8-Se301-C1 | 112,565 | 121,964,401       | 1,824    | 1,093       | 0.0 | 37.3 |
| Se301       | 102,996 | 109,124,144       | 1,803    | 1,082       | 0.0 | 37.4 |

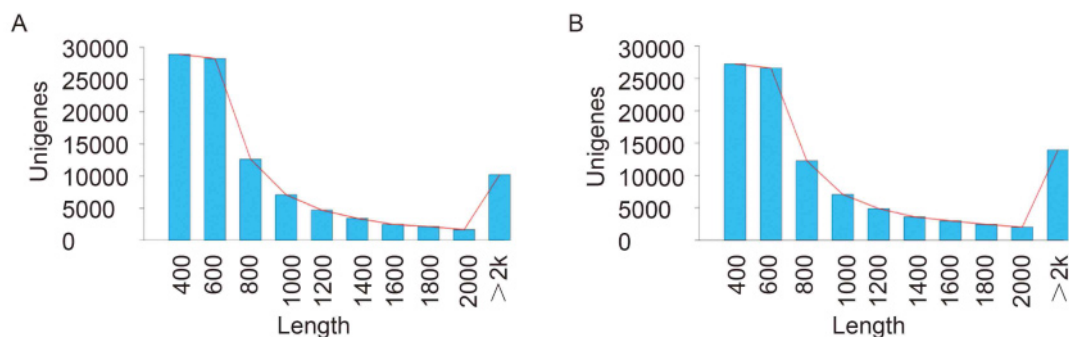

Figure S1. (A) The distribution of the lengths of the final unigenes from P8-Se301-C1 cells. (B) The distribution of the lengths of the final unigenes from Se301 cells.

P8-Se301-C1

Biological processes

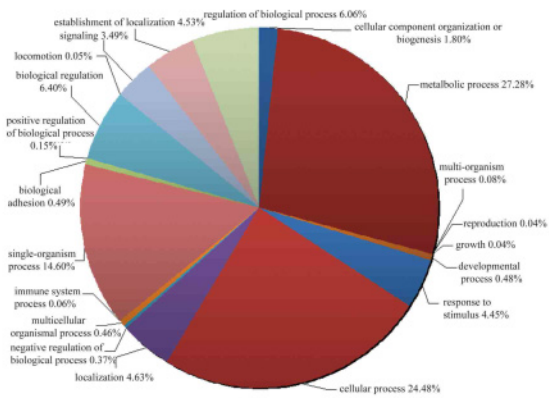

Se301

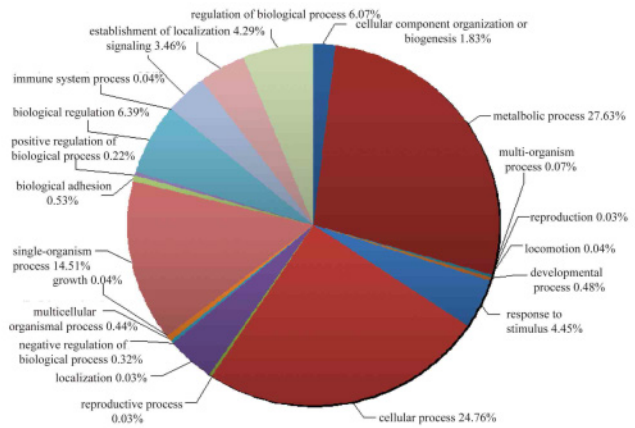

Cellular components

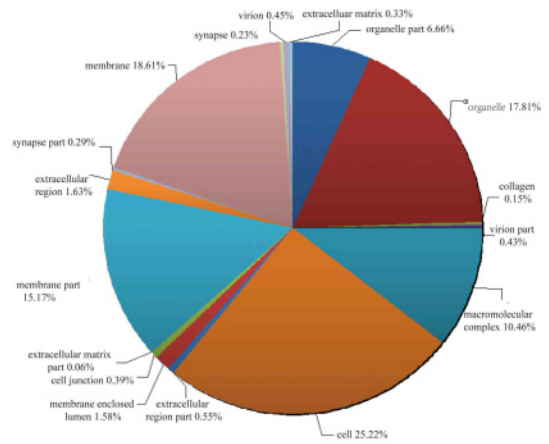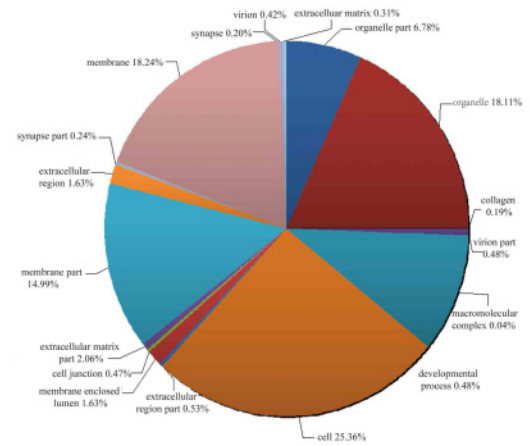

Molecular functions

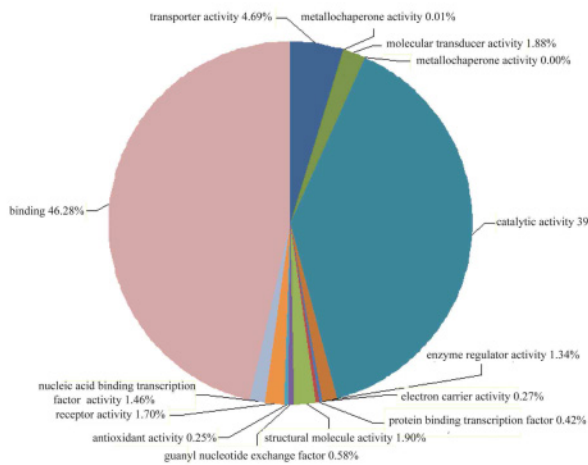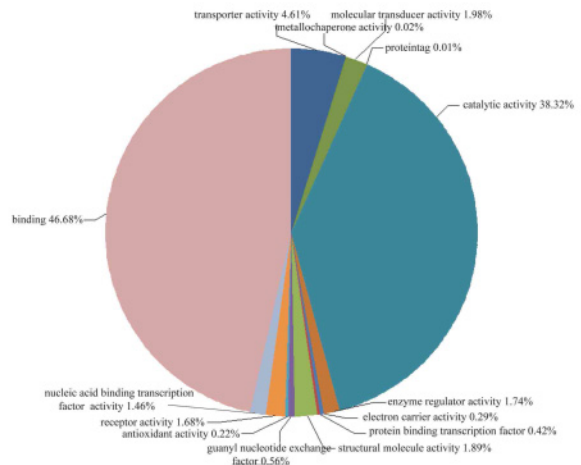

Figure S2. Gene ontology (GO) classification, including cellular components, biological processes, and molecular functions.

A

1 TTTAATACGACTCACTATAGGGCAAGCAGTGGTATCAACGCAGAGTACAT 50  
*Bombyx mori akh2 mRNA for adipokinetic hormone-2 (nt 26-71)*  
51 GGGGAGTTCGACGCTGTTGAACATATTCCTTCAACACTTGTAGCTAATCA 100  
101 TCAATATGGTTAACGATTCCGAGAAACACTGATATCATCGACGCTGTCGTC 150  
*se5 (SeMNPV nt 6190-7713)*  
151 GCCGCCGCCGCCGAGCCTGAACCTCCTCAAAGCAGCGAGCCAATGCAGTA 200  
201 CGACGATGATACAGAAGTCATCAATCAACGCTCTGAAGACCGATTCCAAG 250  
251 AGGAGCCCTGGAACGAGCGGTTGCAAGAAGATTTCGAGTACGAGCGTCAC 300  
301 CAGCGGGAACGTCGTCAACAGCATCGAGATCGTCGTATGAGACAACAGAG 350  
351 TGAGTTACGTGATCAAATTAGATTGATAAATAAACGACATGGTGAATAAT 400  
401 GTGAGTTTTATCGTGTAAATGTCGGGATTTATGCAGCATAACATAAAGAAA 450  
451 AATGGCGCATTATACAAAACTGCCATAGAACACTATATCCAAATGA 500  
501 TAATACATATTACGAACAGGACCATACGGTCTCCTCCTAGATCAGGAT 550  
551 CTTCATCTAGGATCTTCGATTCTCCJAAATTTAATTAATTCGACGACGAC 600  
601 GACCGACGACAACGTCGATAATGATGTAATTGAAAATACTCCTGATGAA 650  
651 ACTACTATTGCCGCCGACGTCGATGCCCTGCCGACGTCGATGCTTCTGC 700  
701 CCGACGTCGATGCCGATGTCGACATCGATGCCGATGCCGATGCATCTGCC 750  
751 TCTGCTATCGTTGCTGAAATCAATGCTATTGCTGACGCCGACGCCAATGC 800  
801 GACGACGACAAGAGTTGGTGAGGATTTGTTTCCCGCTGATTCGATTTTA 850  
851 ATTATTATCTGATTCCGATGATGATTTTGTGTTGAAGAATTCAGACA 900  
901 AAAGTTGATAATGCTATTAGACGTTTAGCTATATTCTTTGAAAAACATCA 950  
951 AAATGTTATTTGAATCAGTACGCTATCAACAAAGATTTTTATGTGAATT 1000  
1001 ACACATAATGAATTTGACGTTCCGCTATTACAATCATTGCGTTGCCAATG 1050  
1051 CATTCCGATTGGATAGACATGTTTGATTTCGATGGCCTACCGTGAAGGT 1100  
1101 GGATAATACAAATATGGCACACGAACAATGGAATGTGATATTTTATGAAA 1150  
1151 TGTGGAAATACATCCATGTAATCCACCGACTCTTTGAAAAAGATATTC 1200  
1201 GATTCGAATTGTAAGAATATTGTTACGCAGTTGGAGGAATTTTGCATGT 1250  
1251 TTACAATAATAAAATAATAAAATTTGACGTGAAATTAACAACCAATTA 1300  
1301 ATATAGACGTCCTATTGAATGGCATTGAAATTTCCGCAGACAATGTTGGT 1350  
1351 AAAACCGAAGAAGGTGTTAAAAATTTGTTIATGGATTCCATTACTGTTT 1400  
1401 ACGTTTTCAACAACAGCAGCAGGAGCATCAGCAGCAGCAGCAGGAGGAGG 1450  
1451 TTGTGCCGTGATGACAGACCGGAAACTCCACCTCATCTTATGCCGCTGCA 1500  
1501 ATGGCTGTCGCTGCTGATGCCACTGTTAGCATGAAATATAATTCGTCGTA 1550  
1551 AATTAGATCATCTATGCCTGTAACGCAATCGCGACGGAGAAACACCCG 1600  
1601 ATGACGAAGATCAAAACAACAGCTGATGCATAATAATTTTTATTGTATTAT 1650  
1651 CGATAGTATTAACAATTGATTATGTTTTTGTATTAATAAATTTTTTTTT 1700  
1701 ATAAAAAAAAAAAAAAAAAAAAAAAAAAAAAATTCCTCCCGTGTATCCAC 1750  
1751 CCGGCCTCACAAAGAAGGGGGAACGAAGGGGGGGGCCAAAAAAAAAAAA 1800  
1801 CCTGCGAGGGGAAGACAAAAGATCAATTTTGGTTTTAGCTAAAAGA 1847

B

```

1   CAGGCAATAGCAGAGTCTTGGCGACTCACTATAGGGCAGCAGTGGTATCA 50
51  ACGCAGAGTCTATGCCACTATCTTCTTGTGCGTTGTGCGCTCTTTTTC 100
101 AATCAAGCGATACGCAATATACGTGGGAGTGATAAATGATGAAGAAAACG 150
    sa7 (SeMNPV nt 9261-10433)
151 ACGACAACCTACAGTAATTTGGTCGTGGAAAAAAGGTGCGGCAAGGGT 200
201 GAACCCCAATCGCGACGACAACAATTCAAAGTTTAAAGATTGGGGGGGC 250
251 GTTTTCTCAGCAATCAAATTTTTCAGCTGAAAAATACGTTCTTCGTTTT 300
301 CCCACCAACTATGGGCATAGGCACCTATTCTTCAACTTTCTGAAAGAGAT 350
351 GGAGTGTACCGTCTCAAGTACGGCGAAGTCGAGCGCAGAACCGTATGTC 400
401 AAGGAGGATGCGGTAAAAAGTTTACCGCGGTAATAAACTTTTGTCTGT 450
451 GTCATAGACAACAATGGAACCGACGACGACGTCGACGATGGGCAATATGA 500
501 AAAAITCAAAGTCGTGTGTCACGTTTGTTCAAACGATTACGCTTAGAAGA 550
551 GGAGATACGAGGTGATGCAATTTCCACCGTTTCGTTGAGCGTCGTC 600
601 GAACGTTTGTGTGAGGTCGGTTTCACTAAATACATTTTCCCATCGA 650
651 TCTCGAGTATACGGTCACCGAGACGAGAACCAGGTTTGCACATAATCCA 700
701 CAATTTCTACAAGATGGTCAAGTCGATCATTGCGGAAAAGAAAACGAACG 750
751 AACACATTACTGAAATTAATTTAGTACGTACGGCCGCGATCTCTTTATC 800
801 GAAACCGACGAGAATTGTGCCATGAGGAACGGCCAAAACGAGTACAATGA 850
851 GCACGTTTACGAACTCGAATTTTCATCCGTCGCCTAGCACTATGATCCCGT 900
901 TTGTTGAGACGTACGCCGAGAAAAACCCCTCACCTACTTCTACACGGTC 950
951 ACTAAACGTGCTATCTCAGCITTTTTCGATTATGCCGTATGTTTTCCGAT 1000
1001 AAAATGTATAAACTATTGCAAAATGTGCAAAACAGGACAAACTATACTTTA 1050
1051 AAATCAATCCCGTCTCTACTGCAGCAATGCGGATTTACCGATGCGAGC 1100
1101 TTGTTCAAAAACGCCCCCTTTCTCAAGAATACAGTGTTTTTGGCAAATG 1150
1151 CGTCAAAGCTAAAACACTACGCCCAACTCGCATCTACTATTATGACATGA 1200
1201 ACCTATACAAATCGTACATGAACAAGGATCTTTGTGATGTCACCTACG 1250
1251 GCGTCTAAAAATAAGTTATTTCGATTTCAAGCCAAAGGCACTAAAGTTTGG 1300
1301 AAAAATTTAATTGTCGTATATCTGTCAATGTTATATTGTATCTTGTAAC 1350
1351 GCACTCGAATTATATGAATATTACAAAAA 1400
    Bombyx mori dh40 mRNA for diuretic hormone 40 (nt 3116-3192)
1401 AAGTACTCTGCGTTGATCCACTGCTTGCCCTATAGTGAGTCGTATTAGGA 1450
1451 ATTCAC TGCCGTCGTTTTCAACGTCGTGACTGGGAAAACCTTGGCGTTA 1500
1501 CCCAATAAAAAAAAAAAAAAAAAAAAAA 1530

```

C

1 GATAAAACGAGTCTAATACGGACTCACTATAGGGCAAGCAGTGGTATCAA 50  
*Bombyx mori dh40 mRNA for diuretic hormone 40 (nt 1035-988)*

51 CGCAGAGTACATGGGGAGTCTTACTACGAAGAGAACCAGTCCGAAGCA 100

101 AAATATGCTGCGTTTTAAAGTGATTGTGTGGCTGGTGGCGGCGTTGACGG 150  
 ss8 (SeMNPV nt 12498-14495)

151 TCGAGGCTAAATTCGCCAAAGACATAGTCCAAGTTACGCCGCTGCCTTCA 200

201 ACGTCGGGTCTATACITTTCAATACATAAACCGAATGCAGITTTGTACAAA 250

251 CATTGGCATTITTCATCGAAATGGACCACGGATCGGTGTTCTATCGCC 300

301 TTCAAAGTATTCATCAGCAGGCGCAAAAATTCAGCAGAGITTCATTTCG 350

351 CTGCGACAAAACCAGACCAGCGCCTTCGACGACTGCGCCAACGTCGAAGTA 400

401 TCTCAAACTCGAGATCGATCAGATGCTTAGCACGGTCATACCGAATCTAG 450

451 CGCAGCAGCACAATTTGCTCGATCAAAAAGTACCTCTGACTCCGTCGAAT 500

501 GCCACTTTGACGAAAGCTACGCTATCTCCGACGAAAAGACGCTCTAAACG 550

551 CGGGCTTTTTAATTTTATGGGACACGTCGACAAATATCTGTTTGGCATT 600

601 TGGACAGCAGCAGCTCAGAACTGCACATGCTCGCCAACACCACAAT 650

651 AGTTTAAACTCTCAAGTCAAACAGTTGAACGACGAACCTATTGTTCTAGC 700

701 CGATTATGTGGACCACGAGITTCACGCCAGCCGTATGCGCGACGCGGACA 750

751 AGCAATGTAGGTACATCATCGAAAATAACATTCTATGCAAGCAACTG 800

801 GACGAGGTGGCCACGCTATACAATAAACTCGATTGGCCGTCGATAATGC 850

851 TAAACTCAACCATCTCAATTCGTTTGTGGTCTCGCCGAACGCTCTCCTCA 900

901 ACGAAATGAACAATGTGAGCGGCCACCTGGCAGGCCITTCGTGGCCCGTG 950

951 CCTCTACCGAAAAAGCGATGCAGTTCATCGACAAGGTGATCAATGT 1000

1001 GCATGTGTTTTCACGGCGGAACGTAATTTGTTTCATCATCGAAGTGC 1050

1051 CTTTGGTCAGCAGCGAAGCGTTTGACGTGTTTACAGCATACCGCTGCCG 1100

1101 TATTGCGACAAATCGCACAATGCGCGATCATGTTGCCGGACAGCAAGTA 1150

1151 TCTCGGTGTGCGGTGGATCGACGAAACTATGTGCGTTTGGACGACACA 1200

1201 CTTGCTGCCGATGAGCGATAAAGTCATGTTGTGTTTTCAGACCTCAAA 1250

1251 ATATACGACGTAATCAGGCAAAAGTTGTGCGACGTCGCGATCTTTATGAA 1300

1301 GAATGACAAGGACATTGATTATAAAGAGACTGCGACGTCAGAGTGGGTA 1350

1351 GGTTCGAAAGCGAACTCTTTTACGCCACCTCCGACTATAACAATTGGCTC 1400

1401 TATGTCCTGCAGAAATGACATTGATTTAAACAITCAGTGTATACCGTCGGC 1450

1451 GACGATTACGGATGGTTTTGGCATTGCGCCCGTCGTGTTGCGCGCCGGC 1500

1501 TGGGCATAATTCACGCGACCGGCAATGACAACTGTAAGTTACCACCAA 1550

1551 AAGTCGCGATTGACGGTGCACGATCTGTACAATAACCTCAACACTGTCAT 1600

1601 CGAAATACCGATGGGTCTATCGTACAACITACCGTGGCTCTACAGGATA 1650

1651 TCGATAAAATTTCCGTCGACGATATGAAAATTAACAACGATCTCGAACAT 1700

1701 ACAAACTTTCACGAACTGACCAGCCGCTATACGATTTGCGGAGACGCAT 1750

1751 CAACAATAATACCGTCTTTTCGGGCAGTCAGGTTGTCGACGACACGGCG 1800

1801 ACATATTCGCCGGCATGCTTCGTGGTTTTCCAGCATCGGTATCGATTT 1850

1851 CATTACGTAAGATTGTAATGATCTGGATAGTAATGGCAATGTTGACGCT 1900

1901 GGCCACCGTTAAAAATTTACCGCACTTGTTGTAGTGGCGCGTGCAGCACT 1950

1951 TGTGTAATAATTTTAAAAATTTGAGAGGCAGCGAACACACCGTCTGTGAGA 2000

2001 CGCGAAGACAGGGACATGATTATCAGACCACGCTGCCAAAGTATAAACG 2050

2051 CGGCAAGAAAACACGTCGACTCGATCTTTGACATGAAATGGAACCCATGT 2100

2101 AACCGATTGATTGTAATAGTACTAGAGTAAAAGAAG 2136

D

```

1   TCTAAATACGACTCACTATAGGGCAAGCAGTGGTATCAACGCAGAGTACA 50
      Bombyx mori akh2 mRNA for adipokinetic hormone-2 (nt 27-71)
51   TGGGGACAAGAATTGGTGTGACGACAGCGTCGTGACCTCTAATGAG 100
      se11 (SeMNPV nt 15817- 15852)
101  GCTCCCGTTTTATATGGCTCACTTTAGGGCAAGCAGTGGTATCAACGCAG 150

151  AGTGCATGGGGAGTCGGCGATCGATCACAACCTGTGCGAACGCATCAGAT 200
      se11 (SeMNPV nt 15923-16101)
201  CTTGATCGATACCAACGTCATTACTCCACACCTCGATACAACATTGGC 250

251  AGTACTGTCACCAAACTCTACTCAACAACAACAACAACAACAACA 300

301  TGCACCGTTGCTGTGCTGGACACCGTCAAATATTGACGATATTGACAAG 350
      se12 (SeMNPV nt 16064-16093)
351  AAGCGGAATATAGCGTTCGTGTTTAGCGAGATACCGTTGCAAGTGACATG 400

401  TCTCACCTCTTTCATCGACAACGGACTGCGCGTCAAGATCAACGGTCATC 450

451  GTTTGTATTATTGATTAATAAATAAGATCAATACGCCGAAGCGTTGACG 500

501  CCGAAAAACAACAATGGTCATTGGAATTATATACAAAAATCACAAGA 550

551  ATGTGTGCTTTCAAACGTTTCGAGCATAAATAACGTCGTTGACATTTTA 600

601  AAGACCAAGCTGAACATGCCCGACTGCATGCAAAGATTCITGGCCGATTI 650

651  TCAAGTTCGTCGCGCGGCAACGTTTTTCGCAACGTTTCATTTTCAACG 700

701  CGTACATCGCCAACGTGATCACTTGACCAAATGCAAGAACTGTGTCTC 750

751  GTAAAGGCCATGAGTTACATATACGGCTTCGATGAAAAGTGTGTACAGGA 800

801  ATTCGACAGACTCTTGTCCGAAACGACACTCTTTACAAGCCGCCCAACT 850

851  GCGAGAACATCAAGAACAAGACAAGTTATGTTTTAATCGGGCACATGC 900

901  AAAGGCACCAATCCAATTTGTAACTTTTAATAA AATACATTTTAAAAACA 950

951  AAAAAAAAAAAAAAAAAAAAAAAAAAAAAA 978

```



E

```

1   GGCCCCCCTTTGGCAAGCAGTGGTTTCATCGCAGAGTACATGGGGAGTI 50
51  CGGTGTTGATGGTGCATTGTATGCTATCGCCGTCGCTGTTGTTTCGCTAAA 100
      se42 (SeMNPV nt 42392-42606)
101 TAAGACAGAACAAAGTCTAAAACACGTCGTCGATTGAACAGCATGCGGTT 150
151 CAATTGTATAATTTTATCGAAAGCATATGCGACGGTGTGAAAGCGGGCC 200
201 TATCGTTGAAACTGCTCTTTATGATTGAAATCATAGAGCCTGAAACATC 250
251 TGCTGTGCATTGAACTTGGACGTATCCACTAGATTGTTGATATTTAAGAT 300
301 CACGTTGAGTAATTGGTTTGGATTTTTCGGTTTGATAAAATTCATTATCA 350
351 TGGAATCGCTGCAGCAACGTCCTTCAAACACAAATCAATCCCTTACATT 400
      se43 (SeMNPV nt 42696-43856)
401 TCTAAAAATACATCAACGACCAACTCGGGGAGTACGTACTACGCAACAC 450
451 CACCGACCATTTTCATCGGGCCATCCTGCCGCAAGCCGTGCTAGCGCTCG 500
501 ACAGCGTGTGGTAGTCAAAGCGGGCGCCGATCGCTGTCCACATGAAA 550
551 AACGGTCAACCTCGTCATCTCATCGACTTCGATCTTGAGGTGTAGCCGA 600
601 CGACAAACGCATCACCGTCAACAATCTTCACTCGTTTATCGCTCTGCAAG 650
651 CGCTCGAAGAGAAAATAAAAAGTATGCGAAAAGTTTTACAATGATATC 700
701 GACGAAACATTGGCCACCGTCAGCGTCAATAGACTCATGAACAGCAACTA 750
751 TGTGCGAAAACAATATGATAATTTTAAATCGTACGTCAACGAAAGCCGTCG 800
801 AAGTGATGCCCGACAACGTCACCTTCGCCCTCAACAGATTGCAGCGGTTT 850
851 AAGAGCACCGTGTGATGGTCAACGACGACTACTTTTTGGTCCGATATTC 900
901 ATTTAACGTTACATGAAGAGCGATTTGTCGCCGATGTGGGTGTACAAGG 1000
1001 AAAAAATCGCGTATCGAGTCTACAATCTTACCCTTTGGCGGTGACTTT 1050
1051 TTGGATCTGAGCGTGAACGTTGCCACGCCCCCATCGACACGTACAC 1100
1101 CTTGGGCAACATTTACGGCATCGACGTGTACGTCGAGGACGTCAGTATC 1150
1151 TCATAGCCGATCAGCTCGAGTGTATACTTTCAATGTATTCAACTATTGT 1200
1201 TGGACCAAAGTCGACAGTAGAATCGATAGATTGTACAACCTAATCTCAAT 1250
1251 ACACAAAACGATTATTTCCAACCCACCGACAAGGAAACGGAGCGTTTCG 1300
1301 AAGAAATCATCAAACCTCTCAAAGCAACGCTATACACTGCGCGACGTGAAG 1350
1351 AGCTTTTCTGTCGCGCTCGGGCGCCTCGGGCCTAAACCGTCATCCAATT 1400
1401 TATCTTTATGAATCGCTTCGACAACCACGTCGAAGTACGTGACCGATGAAA 1450
1451 TCAACTTCCCAACGTCATGGGAGTGTGAATTTTTTCGAAATGTTGG 1500
1501 AAACAATTTTTGTACATCATTAAACATTTATGTACAATCTGGATATAAAAT 1550
1551 TGAATTTTAAAAAAACCAAGATGTACTTGATAAAAAACGTGCGCGCTTT 1600
1601 CTGCTTGCCCTGTGCGCGCGCCTATTGCACTTTTGATGGTTACCCCTTT 1650
1651 GGATTCATTATGTATATCGTCGTTGAACCATCGAACACGA 1691

```

F

```

1 ACCTAAATTTAAATGGCTCCCTATTTGGGAAACACAGGGGTCTAAACCG 50
51 AGTACACGGGGGTACAGTATTTAAAGTGAATCAATCTAGAATACAACACT 100
    se44 (SeMNPV nt 44305-44312)
101 ATCATCAATACAAATATGCTGCGCCACGAAAAGTACTGTTTCCCATCCA 150
151 ACACATTGATCTGTGGGCJTCTTATAAACAGGGGTTGGATTGCATGTGGA 200
    se45 (SeMNPV nt 44408-45394)
201 AAGTGGAAAGAGGTGGATCTATCCAAGACTACGACGACTTTACCCAGAAG 250
251 CTCACCGACAACGAGCGCAACTTTATCGAGAAAAATTTGGCCTTTTTCGC 300
301 CGCCGCCGACAGTATAGTCAACATCAACATCATAGAGCATATGCAACGCA 350
351 CCGTGCCCGAACTGGAGGCGCAATACITTTACAATGAACAGGTGCTCATC 400
401 GAATGTATTACAGGGAAATGTACAATCTTCTCATACACGCITTTGATTAA 450
451 AGACGAAAAGAAAACAAGAGATGCTTTTGAATGGTTTCGAGAATATGCCCT 500
501 GCGTGCGCAGAAAGGCCGAATGGGCGATGAAGTATATTGACGATGAAAAG 550
551 ATAACITTTGGCCGACGATTGTCGCAATTCGCCATTGTCGAAGGAGTGT 600
601 CTTTTCGGGGAGTTTTGCGGCGATATTTACATGAAAACCAAGGGAGTGA 650
651 TGCCCGGACTGACGTTTAGCAACGAATTGATTTGAGAGACGAAGTCTG 700
701 CACACCAACTTTGCGCTGCTCTACTATAATACGAGAGTCGATGAAAAGTI 750
751 GGACGCGCCACCCTCAACGACATGTTCTCCGAAGCCGTGGCCATCGAGA 800
801 TGGAAATTTTTGCTGAGGCTCTGCCGAATCGTTGGTGGGAATGAACGCG 850
851 AATATGATGAGAAAAGTACATTGAGTTTGTCCGCGATCGTCTTCTCGTCA 900
901 GTTAAAGTATCCAAGATGTACTATACTGAGAACCCATTTCGAGTTTATGA 950
951 ACAATATTTCTGTGGAGGGCAAACATAATTTTTTGAGAAACGCGTCGGC 1000
1001 GAATACAAGCGTTTCGGCGCCGGCAAGACAAAATTTCAATTGTTGGAAGA 1050
1051 CTTTTAATAGAAATGAAGAAAGGATTATTGTATATTTTGTATTTGAGTAA 1100
1101 JAAAGAAATTTACATGTA 1118

```

G

```

1 CGAGTTCAGGTTAGACATAGTTCGTTCCCCAAATTTTAGAAGCGGAAAGG 50
51 ATTGCGTTTGAGTGACCAGTTTGGAGCGAGCTAATGAAGCCGTGTATAAT 100
    se88 (SeMNPV nt 85088-85799)
101 ACCCGTACGATCTTCGATCGGCCCTCCAGTTGGACGATGACCAAAATATGA 150
151 CACGATGAGCAGCCGAATTTCAAATGTTTTACCATAATAGTAGAAAACCGT 200
201 TC TTGGCGAGCGTCTCGCGATTGTCCTGTAGTGTGTACGTGAAGTTTTA 250
251 AATATGAGAAAAGGATTGTTTGCCTAGCGCTTCGTTTACGAAATAGCCGCT 300
301 CGGTGGCCATGGGACACGTCGAGAACGTATGATACTTGAGGCGACGTGCG 350
351 TCGAGCTTTTTGATGTATAGCGAACAATATGCGCATTGTAAATTGCATAA 400
401 CGCGTCTCGGTAGATACCCCGGCGACGAGATCGTCGATGTATTCTCGAG 450
451 TCAGGCAACTGTTTTCAAAGGTTTCGAGGCGATCGCCGGATCCTGATAG 500
    se89 (SeMNPV nt 85499-86398)
501 AATCCGGCGGGGCAAGTCGTACGTTTTCCAATTTCTCACGGCGAGCAT 550
551 CGGCGGTGCGGTGGGCATCTTCAAGAATGCAAAGCAATTGTTTCGAGCGCT 600
601 CGTATTTGTTTGGGCAAAGTGTGAGTGCAGCGCGTCAATTTGCGGCC 650
651 CTTTTCGACGACGATGCCATCGGCCAATTTTCCTTTGCAAACATAACT 700
701 TTTCAGAGTTTGCGGCTCGAGAATGCGCCGTTTGTATATGGCGAATTCG 750
751 TTAAAGTGCGAAACGAAATCTTGGAGAAGACTTATTGTTGAGCGTTCGAA 800
801 CGTATCGAAAATTTCAAGACACAATTGCCGCCGGCGCAAGGCATCCA 850
851 CGTAATATACGAACACTCTTTGCGTATTAGATTGTACGAACAGACGATTC 900
901 CTGATCGTTTTCGTTTCCGCTAACGTCAATGCGCCGTCGGCGACGACCA 950
951 GATCACACTTGTTCCTGCAAAAGTACATCAATTCGAATAGCACGTTGGCG 1000
1001 TCGAAAATGTTGCCCGTGTGCAAGCAGCCGTACATTTTTCTAAAATTGGG 1050
1051 ATGGTCAAAGTTGTAATCGCAATCGTTGTCTCGTAAGGTGACGCCGTAGC 1100
1101 CCAGACAATCGGCGTTGGTGTCAAATATGTATTTGGCAAACCTGGCCGGGG 1150
1151 CCTCCGCACAGATCGAGGAACACGTTACGTTGCGACACAATTGAAACTT 1200
1201 GTCGTCAATGTCTCGCATCTTGAATAGCATCGATTACGTACGTGCTGTC 1250
1251 CCCGTTCTAAAGTTTGTGAGCGCGTGTATGTCGCGTACGTACATACTCG 1300
1301 TTCAATTTATCCTTTAACGCGTTCAATTGTTTTTCAAATCCGTCATCC 1350
1351 TTTATCTTCCATTGTTTATG 1370

```

H

```

1  CATCTAATACGACTCACTATAGGGCAAGCAGTGGTATCAACGCAGAGTAC 50
    Bombyx mori akh2 mRNA for adipokinetic hormone-2 (nt 2-71)
51  ATGGGGATATTCAAAGCGGACAGCGTACCAGTAGGTCGATTATCGCTTT 100
    se90 (SeMNPV nt 86521-86789)
101 GTTCAAATTATCGTTGGTGATCAATAGAGTTTTATCIIITGATTTCGTATA 150
151 TCAAAGGTCGATTGTAGTCAAAGTTTTGAAAATTGGCATTGTTAATCAAT 200
201 GTACGAAACGTTACTTGTCCGGCAATTAAGTAGAATATCGATCATCAA 250
251 ATCCTTCCAAGCGTGTTCCTGCTCTCGGGTGATACTTCGACACGGTCCC 300
301 TGTTCAAAAGACGCCATCGAACCATGTCTTTTTCAAATCTCTAATGAAG 350
    se91 (SeMNPV nt 86788-86860)
351 AATATGGCCGAGATTGAGTATGAGTCGTCGTCGTCGTCGTCGTCGTA 400
401 TCGTCTATTAAGACGCTAGCGCAAAAATGTCAGCACAAACAATTCACGGCC 450
    se124 (SeMNPV nt 118809-119391)
451 GATCTACAGGCTCTCATCGATCGGGTCAAGCGGCGCCAAAATCCGACGA 500
501 CAACGACGACGCCGCCCGCTTAAACAACCATCGCGGTTGGGTGACGTGA 550
551 TACAGCACCTCGGTCCGCAACGGTCTGCTTTTGCACGCAAAAAGGATGAA 600
601 AATTCGACATCAACGAAACCATAGACATTCGGACGTGGCAGCGGACTA 650
651 TCGCAATCTTTTGCAAACGGAAAAGTTGAGTTCGTGCGGATTGTGCTATC 700
701 ACAACGACGAAACGCTACGCTGCGAGTTTCACAAAAAGTACATTTTCAAC 750
751 AAAAACCTAAAGATCACTACGACGAATATGTGAATTTCTCAACAGCGA 800
801 GATGGGAGTAATCAGTTTCGTGCAACTCTATTACACGTATCTGGGAGTTG 850
851 TCGCTTGGAGAATTGTTTCGTTGATGATGATGCGCGACCTCACGGATT 900
901 CTCGTCCATTCCGGAACATTGACGTACTACAAC TAGGAATGTAGCGACG 950
951 ACGTCGACACCGTACCTTACGAAACTATGGATTGTGAATAAATCATATGA 1000
1001 TGATTAAAAA 1035

```

I

```

1   GTATGAGAGAGAGGAGAAAGTCTGGGCGATTTTCATCACCCCTGAATGTGTC 50
51  AGGAACGGGGTGTGGGTGGGTGAGTAGCGGTACAGTTTACCGGAAAAAA 100
101 TATGTCGGTTTTGCGGTGATACGGGGCATTAAACAACTATTCGAATGTC 150
      se126 (SeMNPV nt 120802-121788)
151 TGTCGTTTGTGCGGGAATCTCTGCCCTCGACAATTACCTCGACAGCTTT 200
201 TTGCCGGAAGTAGCGGCCGACATTGGGATACTCAAGCCTAAAGCTCCGGC 250
251 GGTCGTGATCTGGTGGGCATGTTGGTGAAGGGCGCGTCGAGCCGTTT 300
301 ACGTATTCGACATGGCAAAAGTTAGGAGATGCTATGAGCACACITCGGGC 350
351 AGTTTTTGAGCATTCTTTGGTCTGAAGCAGTACATCCACAACGACGCCTAT 400
401 GCCAATGTCATCATCAAGTACAAGGTTTTTCGATTTCGATAAAATGAAGCT 450
451 GCAAAATTCGGCGTCCGTCAATCTACCCAGCGACGATGCCGTAGAAAGA 500
501 AGACGACGTTTTGTGCGCAAGTCTTCGATATTAAGCATCATAACAACGAA 550
551 AAGAACTATATGACGGGGCCCTCATCAAGTCGGTAAATGCGAGCCGTT 600
601 CACTGTGAAGAGATTCAACGAATTGTTTCAGTTTCGAGCAGGACAGCAAGA 650
651 GTTCCGACGAAGTTGACATGTTGGTGGGATACAAATGATGGATTCAAG 700
701 CAGGGCAAAAACGACATTGAATTCGATACATTAGTAAACAATAAGAAGGT 750
751 GAGCGAGAAATCGTATTCGCTCGCGATCAAACCCATGGTGTTTTTCCACA 800
801 TTGAAGAATAATAATAAAATTAATTAITTAATAATCATGTAIGTGTTT 850
851 TATATTAACGGTAGTCATGTGGAGAAGAGATTGGTCGGGAGTTTATTAA 900
901 TTTCATTGCGGTGGCAAGATCAAGCACGACATAGAGCCCGAACATGCA 950
951 CGAGGAAGCGTGTGGTGGTTAGATCTAGTTATGCCGCAAAAAGTTGCTC 1000
1001 GCCGCCAACGGCCGAGCGTTTTGGCCGGACGGCAGAAAGTTTCGATGCAA 1050
1051 ACAACCTCAATAATCATCACCACACCACCACCCTTTATCGCCGACGAC 1100
1101 GCGACGGCATCAAACATCATCTCTTTACATCATCGTGCGCGCGACGGC 1150
1151 AATAGCGTCAACGACGACGAATTATGTTGTGACCGAGCTCAAAGCAGTCC 1200
      se127 (SeMNPV nt 121816-122307)
1201 CGCGTTGAGCGAGGATTGGTAGCATAGCACCGCCTTCATAGACATAAACT 1250
1251 TTGATGATGATATTAACAACGACAACGACAAGTCATATTATAACAATGAC 1300
1301 ACCGTACAAAATTTAAACATGCGTATATAGTATAAATAAAAAATTTAAAT 1350
1351 GTGACAAAAAAGTACTCTGCGTTGATACC 1400
      Bombyx mori zfa mRNA for SIFamide (nt 462-524)
1401 ACTGCTTGCCCTAAAGGGAGC 1421

```

Figure S3. The full-length transcripts containing (A) *se5*, (B) *se7*, (C) *se8*, (D) *se12*, (E) *se43*, (F) *se45*, (G) *se89*, (H) *se124* and (I) *se126*. The sequences that align to the SeMNPV genome are presented in blue and the sequences that align with the host genome are presented in black.
